# Supplementary material
Source: Springer Nature journal article supplement (https://www.springermedizin.de/resource/supplementary/12914_2011_165_MOESM1_ESM.pdf/9536926)
Supplement: MOESM1 [file 9536926]

**Position 1 (current counselling practice):**

Respecting patients' autonomy is the benchmark of counselling

↑  
+  
+  
*Emphasis is on patients' autonomy*

**Position 2 (current counselling practice):**

While safeguarding patients' autonomy, patients should be encouraged to disclose their status to their partners for family benefits

*Emphasis on public health interest*

++

**Position 4 (counsellors' wishes):**

HIV should be regarded as a chronic disease; testing and disclosure should be made routine

**Position 3 (counsellors' wishes):**

Protecting patients' sexual partners at risk is essential but counsellors should be legally protected

--

↓  
--
